# Supplementary figures and images for: Adolescent Afghan Refugees Display a High Prevalence of Hyperhomocysteinemia and Associated Micronutrients Deficiencies Indicating an Enhanced Risk of Cardiovascular Disease in Later Life
Source: MDPI journal article supplement (doi:10.3390/nu14091751), 2022-04-22

## Supplementary Materials

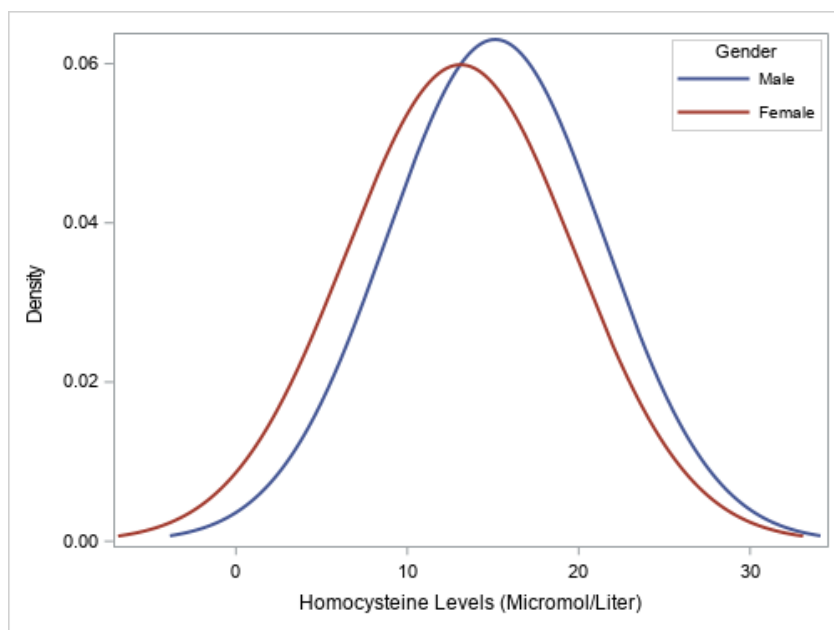

Figure S1: Homocysteine level distribution by gender

Supplement: s1 [file s1]
